# Supplementary material
Source: publisher figshare collection journal article supplement (https://gsapubs.figshare.com/ndownloader/files/23301032)
Supplement: Supplementary file 1 [file 23301032]

## Sheet: Hoja1
TABLE DR2. Hf ISOTOPIC DATA FROM THE STUDIED PLUTONS
Sample	176Hf/177Hf	2σ error (x10-6)	176Lu/177Hf	2σ error (x10-6)	176Yb/177Hf	2σ error (x10-5)	178Hf/177Hf	2σ error (x10-6)	180Hf/177Hf	2σ error (x10-6)	238U/206Pb Age	176Hf/177Hfi	εHf0	2σ error (±)	εHfi
Payandé stock
CSP3
CSP3	0.282783	28	0.001184	2.5	0.02933	36	1.46714	36	1.88697	71	166	0.282779	-0.0707251	0.990159	3.48875
CSP3	0.282789	27	0.001028	6.8	0.0255	180	1.46719	31	1.88702	97	166	0.282786	0.14145	0.954775	3.71813
CSP3	0.282765	29	0.001229	4.4	0.03212	91	1.46718	31	1.88697	90	166	0.282761	-0.707251	1.02559	2.84705
CSP3	0.282753	26	0.00121	12	0.0311	330	1.46716	34	1.88698	99	166	0.282749	-1.1316	0.91953	2.42462
CSP3	0.282769	28	0.001081	3.7	0.02686	96	1.46714	26	1.88693	110	166	0.282766	-0.565801	0.990208	3.0048
CSP3	0.282775	26	0.000677	5.2	0.0155	110	1.46714	30	1.88696	83	166	0.282773	-0.353626	0.919459	3.26141
CSP3	0.28279	26	0.00139	19	0.0364	560	1.46714	34	1.88687	82	166	0.282786	0.176813	0.91941	3.71376
CSP3	0.282776	24	0.000987	4.9	0.0254	130	1.46715	26	1.88688	80	166	0.282773	-0.318263	0.848728	3.26275
CSP 5
CSP5	0.282786	29	0.00093	11	0.0212	250	1.46717	26	1.88701	85	164	0.282783	0.0353626	1.02551	3.57946
CSP5	0.282773	22	0.000649	3.5	0.01539	79	1.46715	36	1.88689	95	164	0.282771	-0.424351	0.778009	3.15006
CSP5	0.282767	27	0.000731	2.2	0.01819	60	1.46714	38	1.88683	91	164	0.282765	-0.636526	0.95485	2.92892
CSP5	0.282761	28	0.000725	2.7	0.01707	62	1.46714	25	1.8869	91	164	0.282759	-0.848701	0.990236	2.71731
CSP5	0.282773	29	0.001039	1.7	0.02425	42	1.46715	33	1.88687	89	164	0.28277	-0.424351	1.02556	3.10776
CSP5	0.282754	25	0.000768	3.3	0.01752	75	1.46718	25	1.88698	100	164	0.282752	-1.09624	0.884161	2.46502
CSP5	0.282752	28	0.000879	2	0.01999	52	1.46713	36	1.88701	79	164	0.282749	-1.16696	0.990267	2.38223
CSP5	0.282801	30	0.00121	20	0.0306	510	1.46713	39	1.88692	93	164	0.282797	0.565801	1.06082	4.07972
Ibagué batholith
CI2
CI2	0.282848	24	0.000505	2.6	0.01321	64	1.46714	32	1.88693	83	144	0.282847	2.22784	0.848512	5.38019
CI2	0.28286	30	0.001214	4.4	0.03078	97	1.46714	38	1.88699	96	144	0.282857	2.65219	1.0606	5.73716
CI2	0.282886	33	0.001186	2.7	0.03196	60	1.46715	29	1.8868	110	144	0.282883	3.57162	1.16655	6.65954
CI2	0.282922	38	0.002265	8.1	0.0599	250	1.46718	34	1.8868	93	144	0.282916	4.84467	1.34313	7.83025
CI2	0.282867	24	0.000809	4.4	0.0213	100	1.46712	31	1.88679	99	144	0.282865	2.89973	0.848455	6.02334
CI2	0.282857	20	0.000948	1.2	0.02512	33	1.46714	34	1.88693	91	144	0.282854	2.5461	0.707071	5.65637
CI2	0.282856	23	0.00131	9.9	0.0337	260	1.46716	32	1.88692	110	144	0.282852	2.51074	0.813135	5.58652
CI9B
CI9B	0.282867	23	0.000718	2.8	0.01916	81	1.46715	31	1.88688	87	142	0.282865	2.89973	0.813103	5.98843
CI9B	0.28286	23	0.000849	3.3	0.02263	92	1.46715	30	1.88693	77	142	0.282858	2.65219	0.813123	5.72851
CI9B	0.28286	29	0.001005	2.4	0.02689	49	1.46716	31	1.88692	91	142	0.282857	2.65219	1.02524	5.71386
CI9B	0.282856	26	0.0009377	0.52	0.02513	11	1.46714	32	1.88697	98	142	0.282854	2.51074	0.919196	5.57869
CI9B	0.282836	29	0.000863	1.3	0.02347	34	1.46713	36	1.88696	110	142	0.282834	1.80349	1.02533	4.87823
CI9B	0.282832	29	0.000656	1.9	0.01751	60	1.46713	30	1.88697	100	142	0.28283	1.66204	1.02534	4.75617
CI9B	0.282872	26	0.000957	1.3	0.02599	22	1.46716	36	1.88697	88	142	0.282869	3.07654	0.919144	6.14286
CI9B	0.28285	23	0.000861	3.7	0.0226	110	1.46715	24	1.88697	97	142	0.282848	2.29857	0.813152	5.37365
CI11
CI11	0.282877	27	0.000549	1.9	0.01446	58	1.46714	37	1.88673	110	153	0.282875	3.25336	0.954478	6.59897
CI11	0.282869	22	0.000729	3.4	0.01941	89	1.46717	33	1.88677	90	153	0.282867	2.97045	0.777745	6.29776
CI11	0.28286	28	0.000743	1.7	0.02011	65	1.46714	30	1.88683	100	153	0.282858	2.65219	0.989889	5.97797
CI11	0.28291	32	0.00065	1.2	0.01763	28	1.46713	36	1.88676	120	153	0.282908	4.42032	1.1311	7.75611
CI11	0.282861	38	0.000808	2.8	0.02167	63	1.46719	29	1.88689	91	153	0.282859	2.68755	1.34342	6.00677
CI11	0.282872	27	0.000556	1.9	0.01415	53	1.46714	20	1.88681	92	153	0.28287	3.07654	0.954495	6.42139
CI11	0.282853	25	0.00031	1	0.00789	26	1.46715	33	1.88696	88	153	0.282852	2.40465	0.883851	5.77416
CI11	0.282854	27	0.0007648	0.46	0.02103	33	1.46718	33	1.88694	93	153	0.282852	2.44002	0.954556	5.76352
CI13
CI13	0.282882	24	0.000487	2.3	0.01331	65	1.46717	27	1.88691	79	143	0.282881	3.43017	0.84841	6.56267
CI13	0.282871	46	0.000739	4.5	0.0207	120	1.46715	43	1.88686	170	143	0.282869	3.04118	1.62618	6.14973
CI13	0.282864	28	0.00191	7.6	0.0549	240	1.46716	33	1.88691	79	143	0.282859	2.79364	0.989875	5.79137
CI13	0.282865	30	0.000831	2.4	0.02274	70	1.46717	32	1.88696	93	143	0.282863	2.829	1.06058	5.92879
CI13	0.282818	37	0.001077	3	0.02937	66	1.46712	33	1.88713	140	143	0.282815	1.16696	1.30826	4.24295
CI13	0.282812	42	0.000683	9.9	0.018	280	1.4671	37	1.88706	140	143	0.28281	0.954789	1.48509	4.06797
CI13	0.282853	41	0.000722	2.7	0.01902	72	1.46716	39	1.88695	130	143	0.282851	2.40465	1.44952	5.51461
CI13	0.282865	21	0.000721	1.5	0.01941	49	1.46713	31	1.88688	94	143	0.282863	2.829	0.742404	5.93919
CI15
CI15	0.282854	37	0.000668	2.6	0.0187	92	1.46717	33	1.88695	110	146	0.282852	2.44002	1.3081	5.62055
CI15	0.2829	40	0.000865	1	0.02466	63	1.46718	36	1.88686	140	146	0.282898	4.06669	1.41393	7.22873
CI15	0.282892	31	0.000867	1.4	0.02406	23	1.46716	35	1.88678	95	146	0.28289	3.78379	1.09582	6.94555
CI15	0.282838	36	0.00064	1.6	0.01676	55	1.46715	29	1.88698	120	146	0.282836	1.87422	1.27281	5.05727
CI15	0.282896	30	0.000823	2.2	0.02312	48	1.46717	36	1.88686	100	146	0.282894	3.92524	1.06046	7.09129
CI15	0.28288	30	0.000729	2.8	0.01973	88	1.46718	26	1.88687	100	146	0.282878	3.35944	1.06052	6.53438
CI15	0.282855	28	0.0004592	0.77	0.01216	11	1.46719	32	1.88691	93	146	0.282854	2.47538	0.989906	5.67608
CI15	0.282862	28	0.000295	1.1	0.00765	28	1.46716	33	1.88689	100	146	0.282861	2.72292	0.989882	5.93956
CI15	0.282858	26	0.0006344	0.58	0.01714	19	1.46714	27	1.88686	100	146	0.282856	2.58147	0.919189	5.76529
CI15	0.282888	29	0.0005206	0.23	0.013863	1.8	1.46717	30	1.88687	100	146	0.282887	3.64234	1.02514	6.8375
Mariquita stock
CM4
CM4	0.282918	32	0.001497	3.8	0.03919	68	1.46715	37	1.88697	97	134	0.282914	4.70322	1.13107	7.54915
CM4	0.282991	34	0.00215	21	0.0574	640	1.46715	37	1.88692	90	134	0.282986	7.28469	1.20145	10.0735
CM4	0.282951	50	0.00234	17	0.063	550	1.46712	40	1.88699	140	134	0.282945	5.87018	1.76709	8.64177
CM4	0.28299	30	0.001488	2.4	0.03673	51	1.46717	40	1.88695	120	134	0.282986	7.24932	1.06011	10.0968
CM4	0.282927	24	0.001524	1.7	0.04105	36	1.46715	36	1.88702	76	134	0.282923	5.02148	0.848275	7.86512
CM4	0.282936	24	0.001605	7.5	0.0424	230	1.46714	38	1.88703	80	134	0.282932	5.33975	0.848248	8.1763
CM4	0.282972	35	0.001759	7.9	0.0461	240	1.46714	46	1.88691	130	134	0.282968	6.6128	1.23687	9.43608
CM4	0.282938	42	0.002977	9.3	0.0792	250	1.46707	35	1.88696	130	134	0.282931	5.41047	1.48442	8.12548
CM7
CM7	0.282972	27	0.001661	3.1	0.0446	100	1.46717	34	1.88687	96	130	0.282968	6.6128	0.954158	9.3601
CM7	0.282975	35	0.00223	19	0.0587	520	1.46715	37	1.88689	97	130	0.28297	6.71889	1.23686	9.41731
CM7	0.282926	45	0.001781	5	0.0461	130	1.46712	34	1.88707	150	130	0.282922	4.98612	1.59052	7.72264
CM7	0.282933	28	0.002075	6.8	0.0544	180	1.46714	38	1.88691	87	130	0.282928	5.23366	0.989634	7.94498
CM7	0.282947	69	0.002072	4.6	0.059	160	1.46714	60	1.88695	230	130	0.282942	5.72873	2.43862	8.44046
CM7	0.282885	38	0.001969	8.6	0.0523	230	1.46715	49	1.88703	130	130	0.28288	3.53626	1.3433	6.2562
CM7	0.282938	33	0.003023	3.8	0.0785	120	1.46713	30	1.88699	110	130	0.282931	5.41047	1.16633	8.04036
CM7	0.282886	46	0.00306	32	0.0857	930	1.46711	51	1.88714	150	130	0.282879	3.57162	1.6261	6.19779
CM10
CM10	0.282921	35	0.00135	6.6	0.0352	160	1.46712	39	1.88682	120	134	0.282918	4.80931	1.23709	7.6683
CM10	0.283014	24	0.002028	5.2	0.0498	150	1.46717	30	1.88683	84	134	0.283009	8.09803	0.848015	10.8979
CM10	0.282955	31	0.001696	2.3	0.04337	55	1.46713	35	1.88688	96	134	0.282951	6.01163	1.09558	8.84032
CM10	0.282931	26	0.002108	6.8	0.0557	200	1.46717	30	1.88688	80	134	0.282926	5.16293	0.918952	7.95486
CM10	0.283049	78	0.001111	5.8	0.0281	160	1.46718	82	1.88644	220	134	0.283046	9.33571	2.75571	12.2172
CM10	0.282896	48	0.001587	6.3	0.0405	140	1.46712	37	1.8869	150	134	0.282892	3.92524	1.69674	6.76297
CM10	0.282982	31	0.00138	4.2	0.03382	85	1.46713	32	1.88677	90	134	0.282979	6.96642	1.09548	9.8234
CM10	0.28301	31	0.001749	5.4	0.0411	130	1.46715	32	1.8868	110	134	0.283006	7.95657	1.09537	10.7811
CM17B
CM17B	0.282911	26	0.00155	5.1	0.0423	140	1.46717	32	1.88689	84	133	0.282907	4.45568	0.919017	7.27561
CM17B	0.282948	22	0.001536	2.1	0.04072	57	1.46714	20	1.88691	80	133	0.282944	5.7641	0.777528	8.58564
CM17B	0.282961	35	0.00173	18	0.0477	580	1.46716	38	1.88688	100	133	0.282957	6.22381	1.23692	9.02843
CM17B	0.282902	28	0.001942	1.2	0.05319	66	1.46714	36	1.88683	82	133	0.282897	4.13742	0.989742	6.92278
CM17B	0.282954	32	0.001859	5.2	0.0524	170	1.46713	30	1.88691	99	133	0.282949	5.97627	1.13093	8.76947
CM17B	0.282937	32	0.00225	11	0.0621	410	1.46711	50	1.88696	120	133	0.282931	5.37511	1.13099	8.13375
CM17B	0.28291	37	0.001757	4.7	0.0438	150	1.46711	37	1.88703	100	133	0.282906	4.42032	1.30784	7.22203
CM17B	0.282907	30	0.001615	3.2	0.04451	75	1.46714	38	1.88696	110	133	0.282903	4.31423	1.06042	7.1284
CM19
CM19	0.283039	49	0.00236	12	0.0629	350	1.46716	48	1.88673	170	130	0.283033	8.98209	1.73121	11.67
CM19	0.28292	75	0.001337	6.3	0.0348	150	1.46712	64	1.887	250	130	0.282917	4.77394	2.65093	7.54857
CM19	0.282879	60	0.00311	16	0.0901	610	1.46712	43	1.88717	190	130	0.282871	3.32408	2.12105	5.94588
CM19	0.282982	65	0.00248	25	0.0658	750	1.46718	41	1.88687	190	130	0.282976	6.96642	2.29697	9.64343
CM19	0.282998	43	0.001917	5.2	0.0502	170	1.46716	39	1.88676	120	130	0.282993	7.53222	1.51945	10.2578
CM19	0.282969	40	0.00244	15	0.0716	480	1.46716	38	1.8869	120	130	0.282963	6.50671	1.41358	9.18703
CM19	0.282945	30	0.001309	3.3	0.03575	84	1.46717	33	1.88683	95	130	0.282942	5.65801	1.06028	8.4353
CM19	0.282995	60	0.00191	10	0.0518	300	1.46714	43	1.88681	180	130	0.28299	7.42614	2.12018	10.1523
